# Supplementary material for: Lipofuscin-like autofluorescence within microglia and its impact on studying microglial engulfment
Source: PubMed Central journal article supplement (PMC10624656; doi:10.1038/s41467-023-42809-y), 2023-11-03
Supplement: 41467_2023_42809_MOESM1_ESM.pdf [file 41467_2023_42809_MOESM1_ESM.pdf]

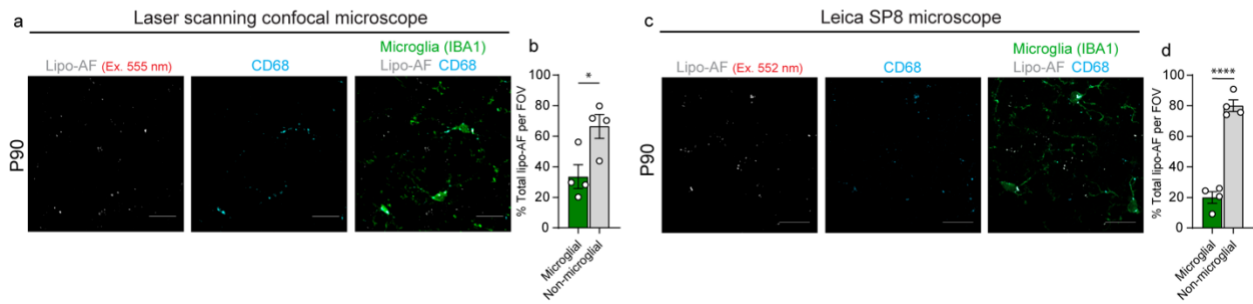

**Supplementary Figure 1. Microglial lipo-AF can be observed on different microscopes.**

**a,c** Representative images of an anti-IBA1 immunolabelled microglia in the P90 mouse somatosensory cortex containing lipo-AF within anti-CD68+ lysosomal compartments taken with a Zeiss laser scanning confocal microscope (a) or a Leica SP8 confocal microscope (c). Scale bars = 20  $\mu$ m. **b,d** Quantification of the percentage of lipo-AF per field of view inside and outside of microglia. Data are represented as mean  $\pm$  SEM, n = 4 mice. **b** Two-tailed unpaired t-test ( $t = 2.990$ ,  $df = 6$ ,  $p = 0.0243$ ); \* $p < 0.05$  and **d** ( $t = 11.26$ ,  $df = 6$ ,  $p < 0.0001$ ); \*\*\*\* $p < 0.0001$ . (3M, 1F for both systems).

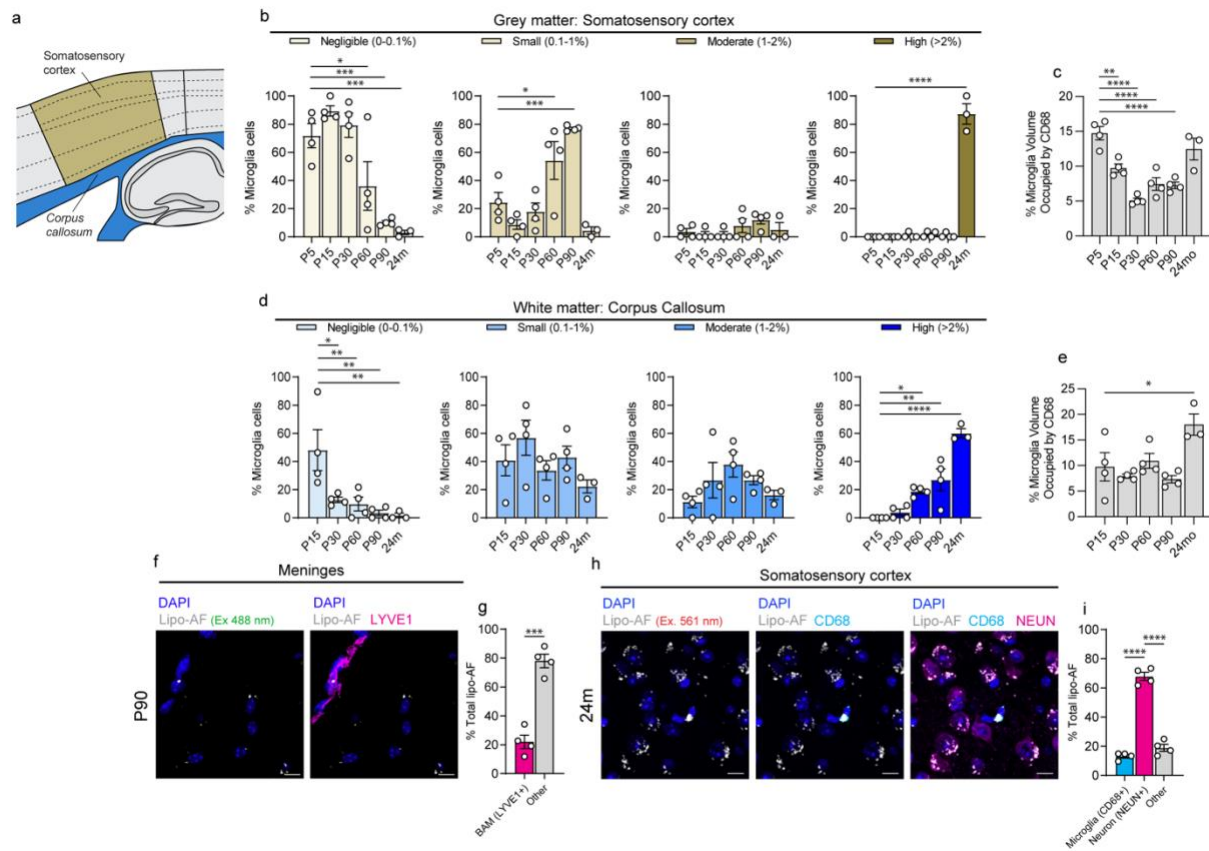

### Supplementary Figure 2. Lipo-AF increases with age.

**a** Graphic illustrating brain regions analyzed. **b,d** Quantifications of each bin from Fig 2b or 2e.  $n = 3-4$  mice (2M, 2F P5-P90; 2M, 1F 24m). One-way ANOVA with Dunnett's multiple comparisons test b (negligible,  $F = 15.50$ ,  $df = 22$ , P5 vs P60  $p = 0.0482$ , P5 vs P90  $p = 0.0007$ , P5 vs 24m  $p = 0.0005$ ; small,  $F = 15.51$ ,  $df = 22$ , P5 vs P60  $p = 0.0345$ , P5 vs P90  $p = 0.0003$ ; moderate,  $F = 1.577$ ,  $df = 22$ ; high,  $F = 193.2$ ,  $df = 22$ ,  $p < 0.0001$ ); \* $p < 0.05$ , \*\*\* $p < 0.001$ , \*\*\*\* $p < 0.0001$ . d (negligible,  $F = 6.68$ ,  $df = 18$ , P15 vs P30  $p = 0.0129$ , P15 vs P60  $p = 0.0074$ , P15 vs P90  $p = 0.0023$ , P15 vs 24m  $p = 0.0031$ ; small,  $F = 1.667$ ,  $df = 22$ ; moderate,  $F = 1.785$ ,  $df = 22$ ; high,  $F = 30.03$ ,  $df = 18$ , P15 vs P60 = 0.0170, P15 vs P90 = 0.0011, P15 vs 24m  $p < 0.0001$ ); \* $p < 0.05$ , \*\* $p < 0.01$ , \*\*\*\* $p < 0.0001$ . **c,e** The percentage of microglial volume occupied by CD68+ lysosomes.  $n = 3-4$  mice (2M, 2F P5-P90; 2M, 1F 24m). One-way ANOVA with Dunnett's multiple comparisons test c ( $F = 19.58$ ,  $df = 22$ , P5 vs. P15  $p = 0.0016$ , P5 vs. P30, P60, P90  $p < 0.0001$ ); \*\* $p < 0.01$  \*\*\*\* $p < 0.0001$ . e ( $F = 5.40$ ,  $df = 18$ , P15 vs. 24mo  $p = 0.0190$ ); \*\* $p < 0.01$ . **f** Representative image of anti-LYVE1+ border associated meningeal macrophages and lipo-AF at P90. Scale bar = 10  $\mu\text{m}$ . **g** The percentage of lipo-AF inside LYVE1+ border associated macrophages.  $n = 4$  mice (3M, 1F). Two-tailed unpaired t-test ( $t = 8.503$ ,  $df = 6$ ,  $p = 0.0001$ ); \*\*\* $p < 0.001$ . **h** Representative image of anti-NeuN+ neurons, lipo-AF and anti-CD68+ microglial lysosomes in the 24m cortex. Scale bar = 10  $\mu\text{m}$ . **i** Quantification of the percentage of lipo-AF inside NeuN+ neurons and CD68+ microglial lysosomes in 24m cortex.  $n = 4$  mice (2M, 2F). One-way ANOVA with Tukey's multiple comparisons test ( $F = 177.2$ ,  $df = 11$ , microglia vs. NeuN  $p < 0.0001$  and microglia vs. other  $p < 0.0001$ ); \*\*\*\* $p < 0.0001$ . All data are presented as a mean  $\pm$  SEM.

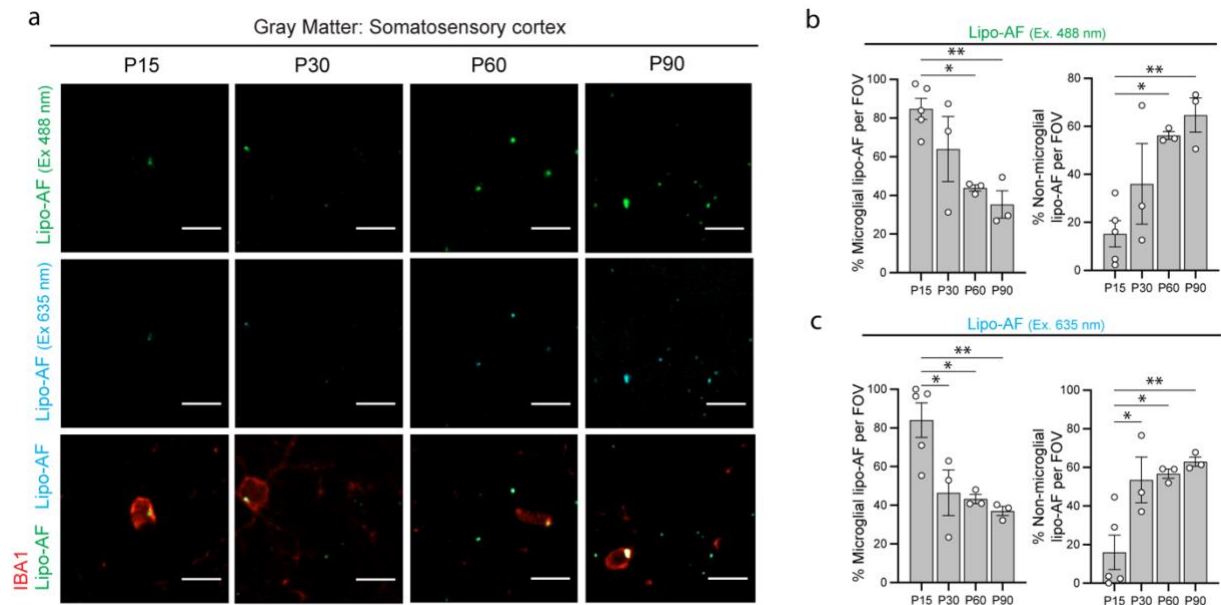

**Supplementary Figure 3. Early lipo-AF accumulation within microglia can be detected with multiple laser lines.**

**a** Representative images of lipo-AF excited with either the 488 nm or 635 nm laser and anti-IBA1+ immunolabelled microglia at different developmental time points. Scale bars = 10  $\mu$ m. **b** Quantification of the percentage of total lipo-AF volume excited by a 488 nm laser per field of view outside and inside of IBA1+ microglia at different time points. Data are represented as mean  $\pm$  SEM, n = 3-5 mice. One-way ANOVA with Dunnett's multiple comparisons test (F = 7.273, df = 13, P15 vs. P60 p=0.0165; P15 vs. P90 p=0.0051); \*p<0.05 \*\*p<0.01. **c** Quantification of the percentage of total lipo-AF volume excited by a 635 nm laser per field of view outside and inside of IBA1+ microglia at different time points. Data are represented as mean  $\pm$  SEM, n = 3-5 mice. One-way ANOVA with Dunnett's multiple comparisons test (F = 7.675, df = 13, P15 vs. P30 p=0.0231; P15 vs. P60 p=0.0147; P15 vs. P90 p=0.0061); \*p<0.05. (1M, 4F P15; 2M, 1F) for all other time points.

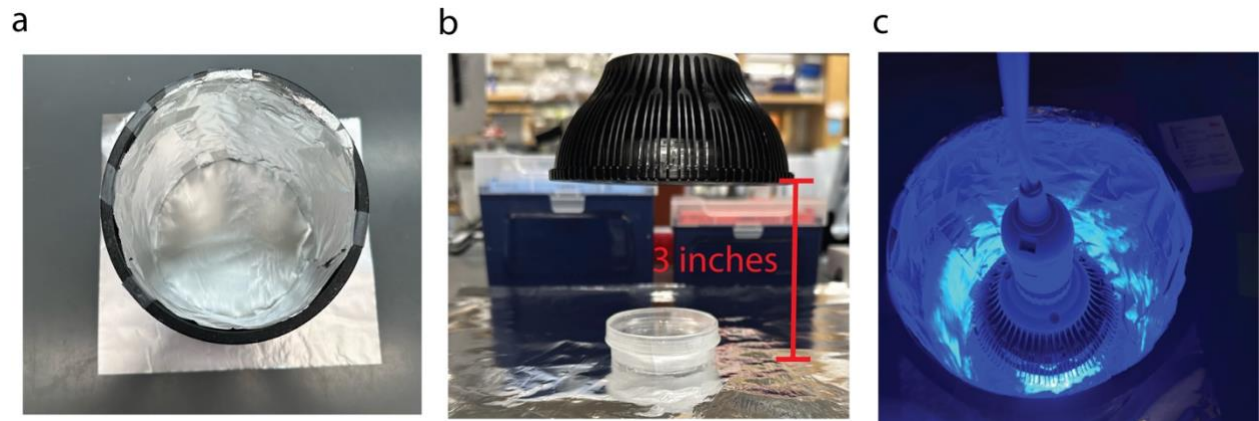

**Supplementary Figure 4. A cost effective and simple lab-made photobleacher.**

**a** Top-down view of lab-made photobleacher with an aluminum foil inside casing. **b** Horizontal view showing distance between the HiGrow LED bulb 450-460 nm and the tissue sample. **c** Top-down view of lab made photobleacher showing chamber when LED light has been turned on. Foil can be placed on top during photobleaching.

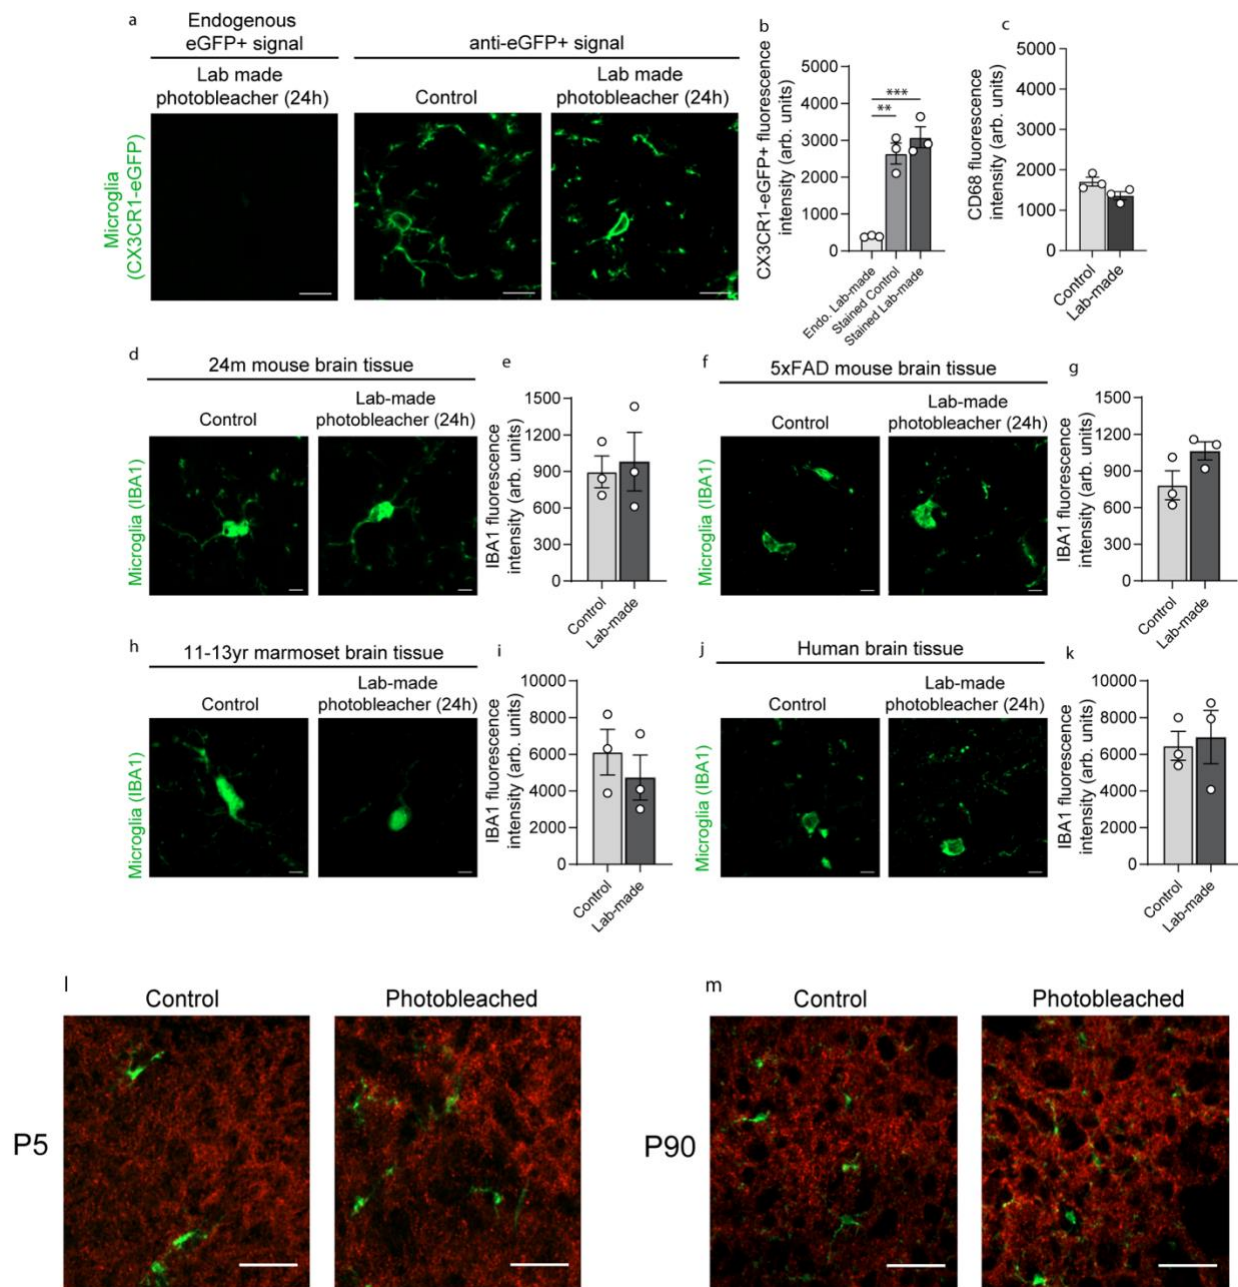

**Supplementary Figure 5. The lab-made photobleacher does not impact subsequently immunolabelling.**

**a** Representative images of CX3CR1-eGFP+ microglia from the mouse somatosensory cortex after photobleaching. Images show either endogenous fluorescence or anti-eGFP-immunolabelling signal. Scale bar = 10  $\mu$ m. **b** Quantification of eGFP+ fluorescence intensity comparing photobleached endogenous (Endo) eGFP signal with anti-eGFP-immunolabelling signal with and without photobleaching. n = 3 mice (3M). One-way ANOVA with Tukey's multiple comparisons test (F = 40.69, df = 11, Endo lab-made vs. stained control p=0.0012; Endo lab-made vs. stained lab-made p=0.0004); \*\*p<0.01 \*\*\*p<0.001. **c** Quantification of CD68 fluorescence with and without the lab-made photobleacher. n = 3 mice (3M). Paired two-tailed T test (t = 3.114, df = 2). **d** Representative images of

anti-IBA1 immunolabelled microglia in 24-month-old mouse somatosensory cortex. Scale bar = 5  $\mu\text{m}$ . **e** Quantification of anti-IBA1 immunolabelled microglia fluorescence intensity before and after photobleaching in 24-month-old mouse somatosensory cortex.  $n = 3$  mice (2M, 1F). Paired two-tailed T test ( $t = 0.3269$ ,  $df = 2$ ). **f** Representative images of anti-IBA1 immunolabelled microglia in 9-month-old 5xFAD mouse somatosensory cortex. Scale bar = 5  $\mu\text{m}$ . **g** Quantification of anti-IBA1 immunolabelled microglia fluorescence intensity before and after photobleaching in 9-month-old 5xFAD mouse somatosensory cortex.  $n = 3$  mice (1M, 2F). Paired two-tailed T test ( $t = 1.494$ ,  $df = 2$ ). **h,j** Representative images of anti-IBA1 immunolabelled microglia in FFPE 11-13-year-old marmoset brain (h) or in FFPE human MS brain (j). Scale bar = 5  $\mu\text{m}$ . **i,k** Quantification of anti-IBA1 immunolabelled microglia fluorescence intensity before and after photobleaching in FFPE 11-13-year-old marmoset brain (i) or in FFPE human MS brain (k).  $n = 3$  mice (2M, 1F for Marmoset; 3F for Human). **i** Paired two-tailed T test ( $t = 0.2126$ ,  $df = 2$ ). **k** Paired two-tailed T test ( $t = 3.260$ ,  $df = 2$ ). **l,m** Representative images at 20X of anti-IBA1+ immunolabelled microglia and anti-VGluT2+ synapses from layer IV of the P5 (g) or P90(h) somatosensory cortex with and without photobleaching. Scale bar = 50  $\mu\text{m}$ . All data are represented as mean  $\pm$  SEM.

## Supplementary Source Data
